# Supplementary material for: Acidosis Activates the Nrf2 Pathway in Renal Proximal Tubule-Derived Cells through a Crosstalk with Renal Fibroblasts
Source: MDPI journal article supplement (doi:10.3390/antiox12020412), 2023-02-08
Supplement: s1 [file s1]

Supplementary figures

Supplementary figure S1

<https://software.broadinstitute.org/morpheus/>:

Clustering:  
Euclidian distance  
Linkage method = average

Similarity matrix:  
Pearson correlation

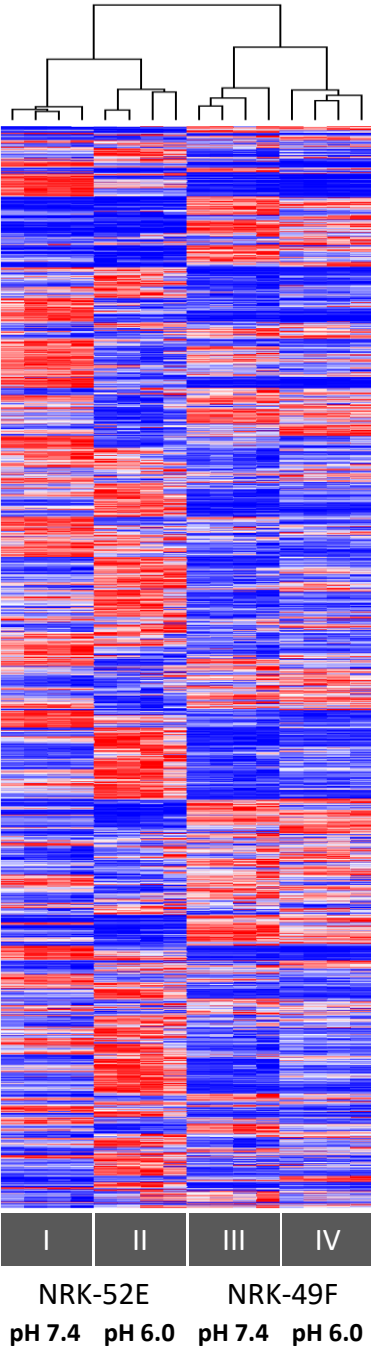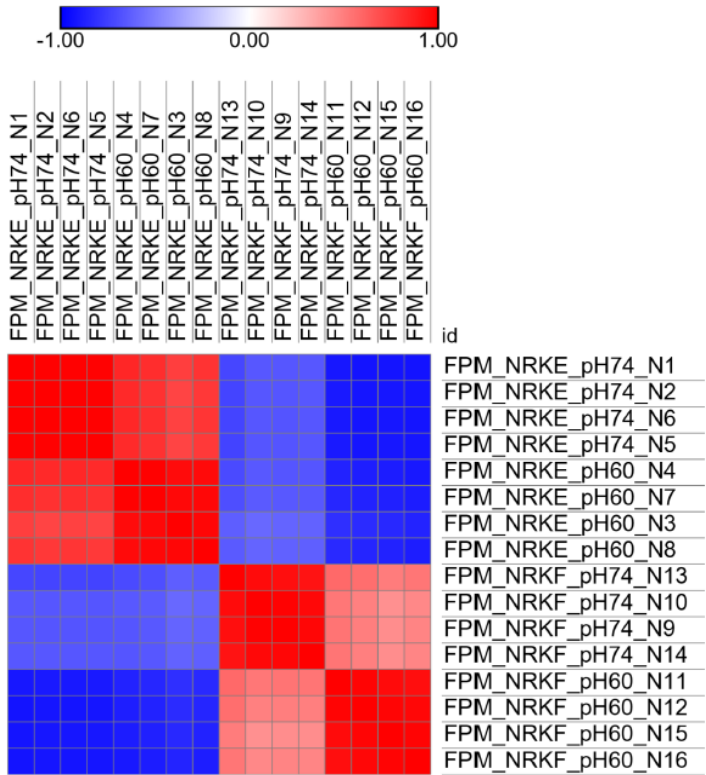

all, FPM>10, 11122 genes

**Supplementary Table S1. Buffer composition**

|                        |                                                                                                                          |
|------------------------|--------------------------------------------------------------------------------------------------------------------------|
| EDTA buffer            | <ul style="list-style-type: none"><li>• 136.8 mM NaCl</li></ul>                                                          |
|                        | <ul style="list-style-type: none"><li>• 2.68 mM KCl</li></ul>                                                            |
|                        | <ul style="list-style-type: none"><li>• 8.1 mM Na<sub>2</sub>HPO<sub>4</sub> x 2 H<sub>2</sub>O</li></ul>                |
|                        | <ul style="list-style-type: none"><li>• 2 mM KH<sub>2</sub>PO<sub>4</sub></li></ul>                                      |
|                        | <ul style="list-style-type: none"><li>• 0,7 mM EDTA</li></ul>                                                            |
|                        | <ul style="list-style-type: none"><li>• pH 7,2</li></ul>                                                                 |
| MOPS-Triton buffer     | <ul style="list-style-type: none"><li>• 10 mM TRIS base</li></ul>                                                        |
|                        | <ul style="list-style-type: none"><li>• 20 mM MOPS</li></ul>                                                             |
|                        | <ul style="list-style-type: none"><li>• 100 mM NaCl</li></ul>                                                            |
|                        | <ul style="list-style-type: none"><li>• 1 mM EDTA</li></ul>                                                              |
|                        | <ul style="list-style-type: none"><li>• 0.01 % Triton X-100</li></ul>                                                    |
|                        | <ul style="list-style-type: none"><li>• pH adjusted to 7.5</li></ul>                                                     |
| 6xRedmix/Lämmli buffer | <ul style="list-style-type: none"><li>• 124.8 mM TRIS HCl (AppliChem GmbH, Darmstadt, GER)</li></ul>                     |
|                        | <ul style="list-style-type: none"><li>• 6 % SDS (Carl Roth GmbH&amp;CoKG, Karlsruhe, GER)</li></ul>                      |
|                        | <ul style="list-style-type: none"><li>• 1,42 mM β-Mercaptoethanol (Sigma-Aldrich Co, St. Louis, USA)</li></ul>           |
|                        | <ul style="list-style-type: none"><li>• 4,7 mM Glycerol (Sigma-Aldrich Co, St. Louis, USA)</li></ul>                     |
|                        | <ul style="list-style-type: none"><li>• 155.2 mM Bromphenol Blue (SERVA Electrophoresis GmbH, Heidelberg, GER)</li></ul> |
|                        | <ul style="list-style-type: none"><li>• pH 6.8</li></ul>                                                                 |
| running buffer         | <ul style="list-style-type: none"><li>• 25 mM TRIS</li></ul>                                                             |

|                      |                                                                                                                                                                                   |
|----------------------|-----------------------------------------------------------------------------------------------------------------------------------------------------------------------------------|
|                      | <ul style="list-style-type: none"> <li>• 3,5mM SDS</li> <li>• 192mM glycine</li> </ul>                                                                                            |
|                      | <ul style="list-style-type: none"> <li>• 20 % MeOH</li> </ul>                                                                                                                     |
| transfer buffer      | <ul style="list-style-type: none"> <li>• 25mM Tris</li> <li>• 192mM glycine</li> </ul>                                                                                            |
|                      | <ul style="list-style-type: none"> <li>• 154mM NaCl</li> <li>• 2.7 mM KCl</li> <li>• 8.2mM Na<sub>2</sub>HPO<sub>4</sub></li> <li>• 1.5mM KH<sub>2</sub>PO<sub>4</sub></li> </ul> |
| trypsin solution     | <ul style="list-style-type: none"> <li>• 0,7mM EDTA</li> <li>• 0,2mM streptomycin</li> <li>• 0,18mM penicillin</li> <li>• 0.02mM trypsin</li> <li>• pH7,1-7,3</li> </ul>          |
|                      | <ul style="list-style-type: none"> <li>• 3mM TRIS base</li> <li>• 140mM NaCl</li> </ul>                                                                                           |
| 1xTBS TWEEN          | <ul style="list-style-type: none"> <li>• 0.17mM TRIS-HCl</li> <li>• 1 % TWEEN 20</li> <li>• pH7.4</li> </ul>                                                                      |
| equilibration buffer | <ul style="list-style-type: none"> <li>• 10 mM TRIS (pH 7.3)</li> </ul>                                                                                                           |

|                   |                                                                                                                                                           |
|-------------------|-----------------------------------------------------------------------------------------------------------------------------------------------------------|
|                   | <ul style="list-style-type: none"><li>• 10 mM KCl</li><li>• 1.5 mM MgCl</li><li>• 0.5 mM β-Mercaptoethanol</li><li>• 1 : 100 protease inhibitor</li></ul> |
| lysis buffer      | <ul style="list-style-type: none"><li>• equilibration buffer</li><li>• 0.4 % nonidet P40</li></ul>                                                        |
|                   | <ul style="list-style-type: none"><li>• 20 mM HEPES</li><li>• 0.4 M NaCl</li></ul>                                                                        |
| extraction buffer | <ul style="list-style-type: none"><li>• 1 mM EDTA</li><li>• 1 mM DTT</li><li>• 1 : 100 protease inhibtor</li></ul>                                        |

**Supplementary Table S2. Primer sequences and annealing temperatures**

| Gene name                        | Accession number | Forward 5'-3'             | Backward 5'-3'                 | Annealing °C |
|----------------------------------|------------------|---------------------------|--------------------------------|--------------|
| <i>Hprt1</i>                     | NM_012583.2      | ACCAGTCAACGGGG-<br>GACATA | TTGGGGCTG-<br>TACTGCTTGAC      | 60 °C        |
| <i>Nrf2</i><br>( <i>Nef2l2</i> ) | NM_031789.2      | ACTACAGTCCCAG-<br>CAGGACA | GTTTGG-<br>GAATGTGGG-<br>CAACC | 60 °C        |
| <i>Tkt</i>                       | NM_022592.2      | TCCATACCATGCGC-<br>TACAAG | ATAAGATGG-<br>GAGCTGCATGG      | 60 °C        |

Abbreviations: *Hprt* - Hypoxanthine Phosphoribosyltransferase 1, *Nrf2* (*Nef2l2*) - Nuclear factor erythroid 2-related factor 2, *Tkt* - transketolase
